# Supplementary material for: Exploratory Research on Sweetness Perception: Decision Trees to Study Electroencephalographic Data and Its Relationship with the Explicit Response to Sweet Odor, Taste, and Flavor
Source: MDPI journal article supplement (doi:10.3390/s22186787), 2022-09-08
Supplement: s1 [file s1]

**SUPPLEMENTARY MATERIAL**

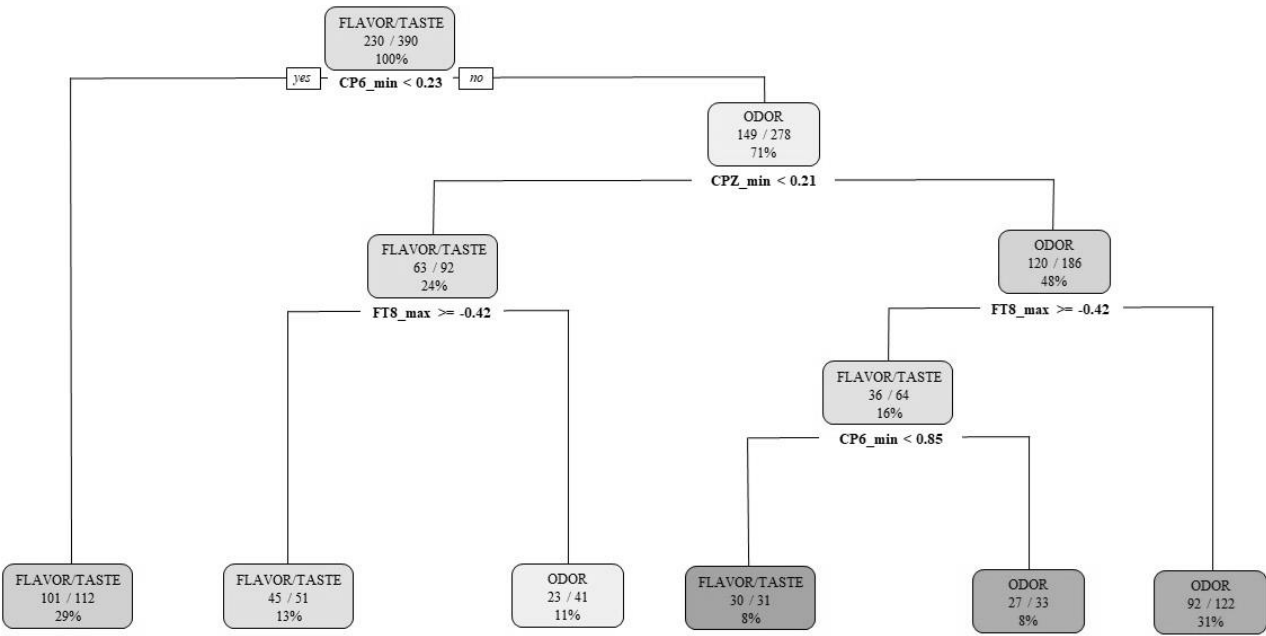

**Figure S1a.** Decision tree of odor vs. taste/flavor discrimination task.

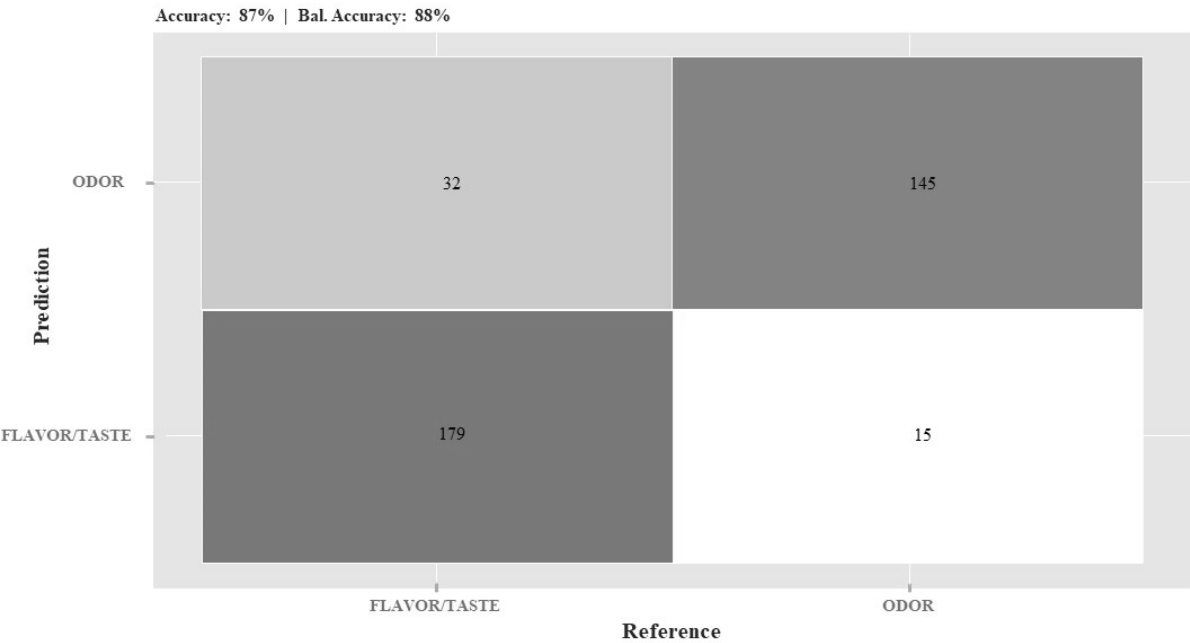

**Figure S1b.** Confusion matrix of the descriptive model shown in Figure S1a.

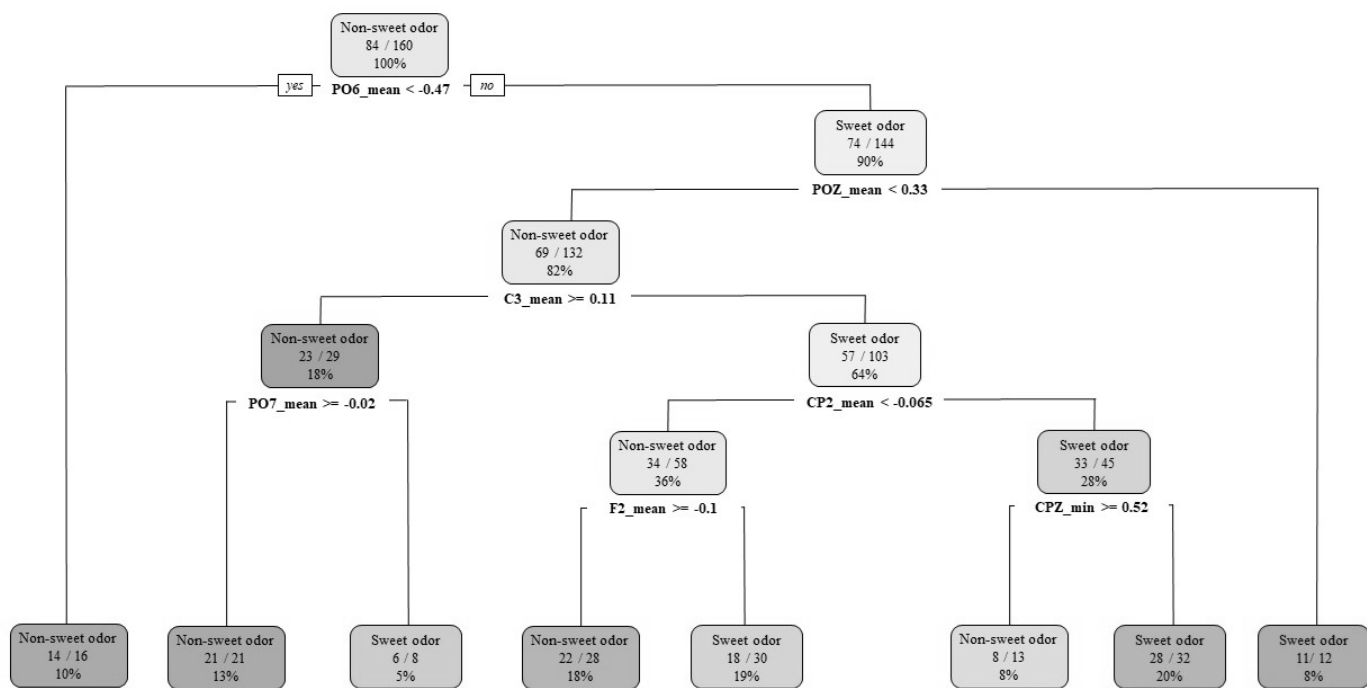

**Figure S2a.** Decision tree of sweet odor vs. non-sweet odor discrimination task.

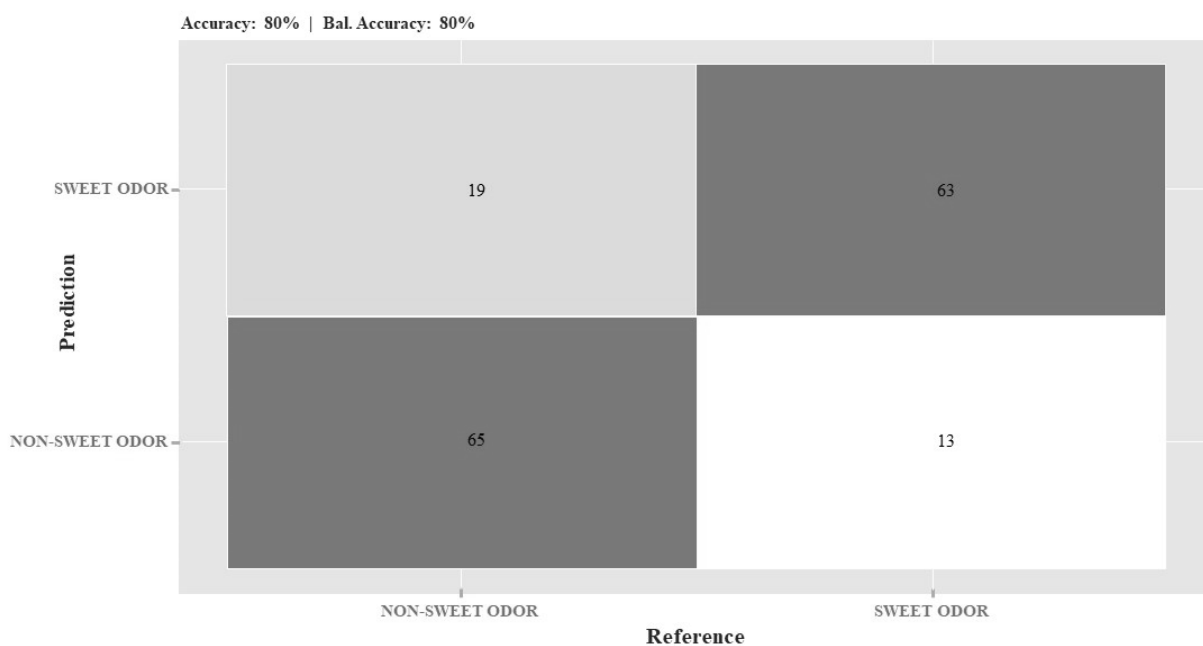

**Figure S2b.** Confusion matrix of the descriptive model shown in Figure S2a.

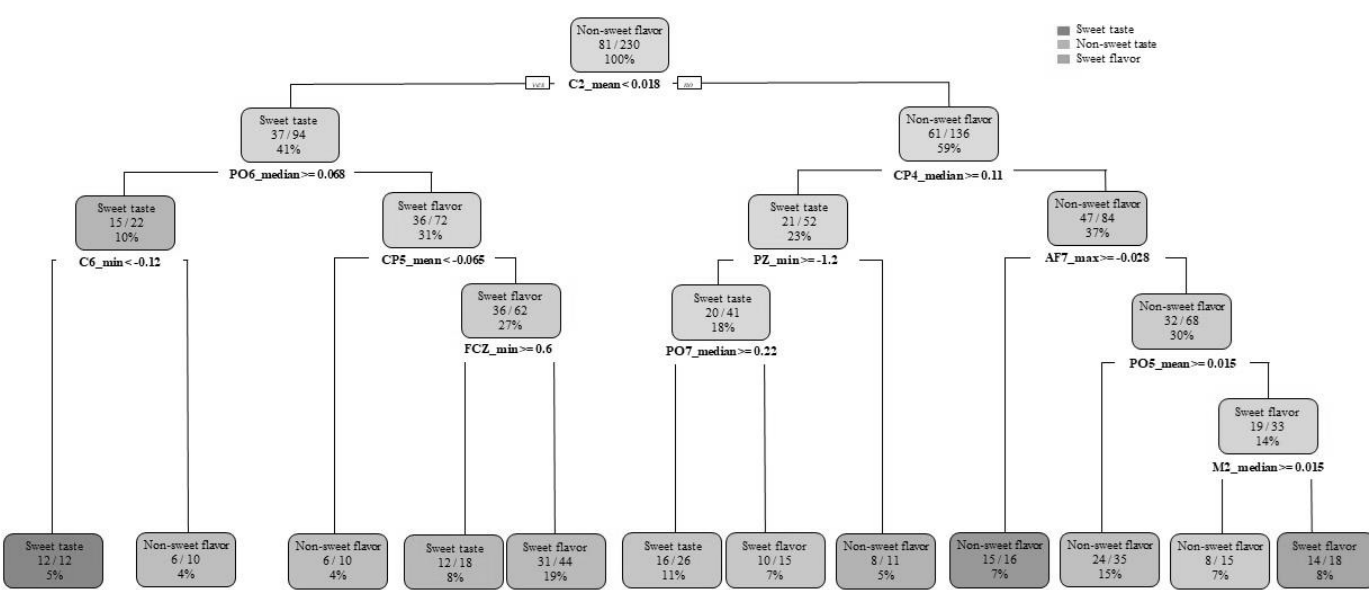

**Figure S3a.** Decision tree of taste/flavor discrimination task (sweet taste, sweet flavor & non-sweet flavor).

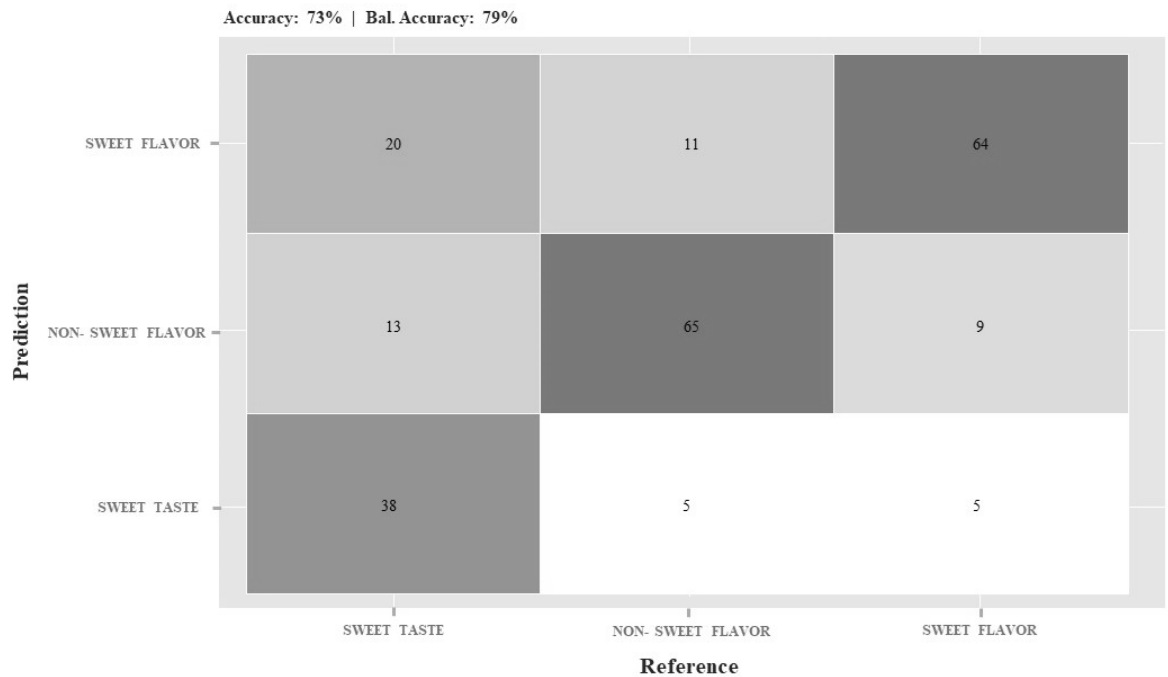

**Figure S3b.** Confusion matrix of the descriptive model shown in Figure S3a.

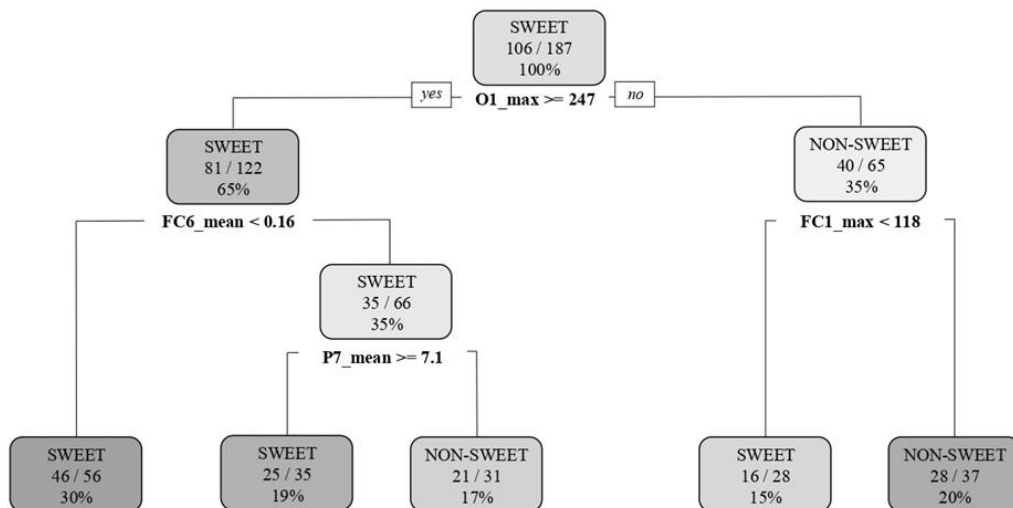

**Figure S4a.** Decision tree of sweet (sweet odor, sweet taste & sweet flavor) vs. non-sweet (non-sweet odor & non-sweet flavor) discrimination task.

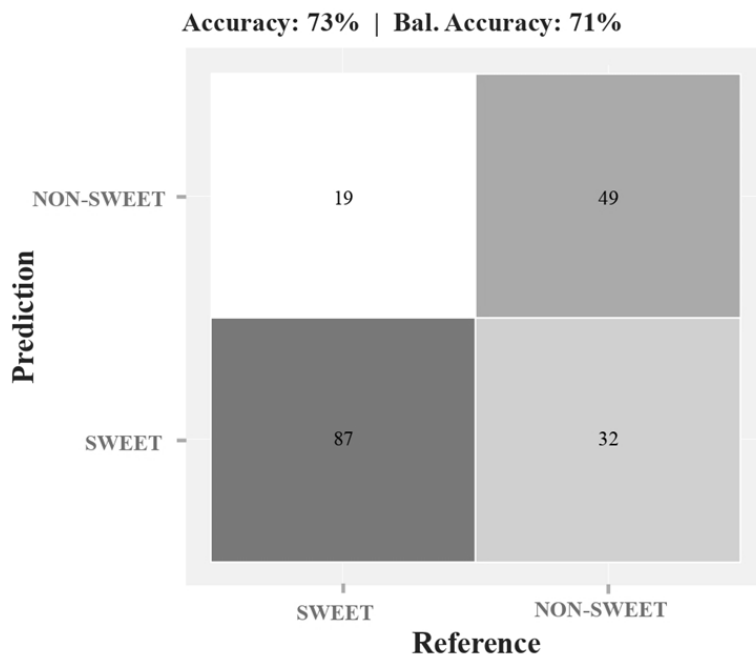

**Figure S4b.** Confusion matrix of the descriptive model shown in Figure S4a.
